# Supplementary material for: Live cell imaging of single RNA molecules with fluorogenic Mango II arrays
Source: PubMed Central journal article supplement (PMC7062757; doi:10.1038/s41467-020-14932-7), 2020-03-09
Supplement: 41467_2020_14932_MOESM1_ESM.pdf [file 41467_2020_14932_MOESM1_ESM.pdf]

## Supplementary Information

### Live Cell Imaging of Single RNA Molecules with Fluorogenic Mango II Arrays

Cawte *et al.*

**Supplementary Table 1. DNA constructs, primers and FISH probes**

| <b>Constructs, primers and probes</b> | <b>Sequence (5' → 3')</b>                                                                                                                                                                   |
|---------------------------------------|---------------------------------------------------------------------------------------------------------------------------------------------------------------------------------------------|
| Mango II                              | GGCACGTACG AAGGAGAGGA GAGGAAGAGG AGAGTACGTG C                                                                                                                                               |
| M2 x3 array (5 nt)                    | GGCACGTACG AAGGAGAGGA GAGGAAGAGG AGAGTACGTG<br>CTTTTGGAC ATGCCGAAGG AGAGGAGAGG AAGAGGAGAG<br>GCATGTCCTT TTTGGGTGCA TCGAAGGAGA GGAGAGGAAG<br>AGGAGAGATG CACCC                                |
| M2 x3 array (1 nt)                    | GGCACGTACG AAGGAGAGGA GAGGAAGAGG AGAGTACGTG<br>CTGGACATGC CGAAGGAGAG GAGAGGAAGA GGAGAGGCAT<br>GTCCTGGGTG CATCGAAGGA GAGGAGAGGA AGAGGAGAGA<br>TGCACCC                                        |
| Broccoli                              | GGAGACGGTC GGGTCCAGAT ATTCGTATCT GTCGAGTAGA<br>GTGTGGGCTC C                                                                                                                                 |
| Broccoli Double (10 nt)               | GGAGACGGTC GGGTCCAGAT ATTCGTATCT GTCGAGTAGA<br>GTGTGGGCTC CCTCTCTCTC TGGAGACGGT CGGGTCCCTC<br>GATTCGTCGA GGTTCGAGTAG AGTGTGGGCT CC                                                          |
| Broccoli Triple (5 nt)                | GGAGACGGTC GGGTCCAGAT ATTCGTATCT GTCGAGTAGA<br>GTGTGGGCTC CTTTTGGCT ACGGTCGGGT CCCTCGATTC<br>GTCGAGGTCG AGTAGAGTGT GGGAGCCTTT TTGGTCACGG<br>TCGGGTCCTC TAATTCGTTA GAGTCGAGTA GAGTGTGGGG ACC |
| 5' AgeI mCherry                       | AGC ACC GGT CGC CAC CAT GGT GAG                                                                                                                                                             |
| 3' BamHI SV40 pA                      | CCC GGA TCC TTG TTG TTA ACT TGT TTA TTG                                                                                                                                                     |
| pmax_M2/MS2_Bam-Pvu QuickChange_1     | ATA AGT ACC GTA CGA TCG TTA TCA CTC GAG CCT GGA ATA C                                                                                                                                       |
| pmax_M2/MS2_Bam-Pvu QuickChange_2     | GTA TTC CAG GCT CGA GTG ATA ACG ATC GTA CGG TAC TTA T                                                                                                                                       |
| 5' XbaI M2 array                      | AGC TCT AGA CGA TCG TAC GGT ACT TAT TGC CAA GAA AGG                                                                                                                                         |
| 3' BclI SV40 pA                       | AAC TGA TCA TTG TTG TTA ACT TGT TTA TTG                                                                                                                                                     |
| 5' BamHI B-act 3'UTR                  | TAG GGA TCC GCG GAC TGT TAC TGA GCT G                                                                                                                                                       |
| 3' BclI B-act 3'UTR                   | TTA TGA TCA TAG GAG TGG GGG TGG C                                                                                                                                                           |
| 5' Halo Bact insert Gibson            | GGA GAA TTG GCT AGC ACC GGT CCG GCC GCC ACC ATG GAT TAC                                                                                                                                     |
| 3'Halo Bact insert Gibson             | CTT GGC AAT AAG TAC CGT ACG ATC GTA GGA GTG GGG GTG GCT<br>TTT G                                                                                                                            |

|                                     |                                                                      |
|-------------------------------------|----------------------------------------------------------------------|
| 3' Halo Bact Δ3UTR<br>insert Gibson | CTT GGC AAT AAG TAC CGT ACG ATC GCT AGC TAG CCT AGA AGC<br>ATT TGC G |
| pLenti-M2 array<br>Gibson_Fwd       | CGA TCG TAC GGT ACT TAT TGC CAA G                                    |
| pLenti-M2 array<br>Gibson_Rev       | GAC CGG TGC TAG CCA ATT CTC C                                        |
| M2-AF488 smFISH_1                   | AF488N//CGGCATGTCC AAAAAGCACG                                        |
| M2-AF488 smFISH_2                   | AF488N//ATGCACCCAA AAAGGACTG                                         |
| M2-AF488 smFISH_3                   | AF488N//TACGTGCCAA AAAGGGTGCA                                        |
| MS2v5-FAM<br>smFISH_1               | FAM//TGATTGTGAAGTGTCGGGTG                                            |
| MS2v5-FAM<br>smFISH_2               | FAM//TCCACCCTTGTGTATTGTAC                                            |
| MS2v5-FAM<br>smFISH_3               | FAM//TGTAATGTGTCTGGAGGGTG                                            |
| MS2v5-FAM<br>smFISH_4               | FAM//GCTTCTGTTTGATTGGATTT                                            |
| MS2v5-FAM<br>smFISH_5               | FAM//GATGGTGATTCCTTGTTGTA                                            |
| MS2v5-FAM<br>smFISH_6               | FAM//GTATATTGCACAGGGAATCC                                            |
| MS2v5-FAM<br>smFISH_7               | FAM//GATATTCGGGAGGCGTGATC                                            |
| MS2v5-FAM<br>smFISH_8               | FAM//ACGCACTGAATTCGAAAGCC                                            |
| MS2v5-FAM<br>smFISH_9               | FAM//ATTCGACTCTGATTGGCTGC                                            |
| MS2v5-FAM<br>smFISH_10              | FAM//CTCTTCGCGAAAGTCGACTT                                            |
| MS2v5-FAM<br>smFISH_11              | FAM//TAAGAATGGCGCGAAGGCTG                                            |
| MS2v5-FAM<br>smFISH_12              | FAM//GTAGGGGAGAGTGTGGTTTG                                            |
| MS2v5-FAM<br>smFISH_13              | FAM//CAGGAACGCTGATGCTGTTC                                            |
| MS2v5-FAM<br>smFISH_14              | FAM//TTTTCTTGAGTTGGGTACTG                                            |

|                        |                           |
|------------------------|---------------------------|
| MS2v5-FAM<br>smFISH_15 | FAM//TGATGCTGCATGGGGACATA |
| MS2v5-FAM<br>smFISH_16 | FAM//TTGGGGATGTATTCTTGGGG |
| MS2v5-FAM<br>smFISH_17 | FAM//TTGGTGCTCGGATGTGATTT |
| MS2v5-FAM<br>smFISH_18 | FAM//AAGAAACAACACTCCGAGCC |
| MS2v5-FAM<br>smFISH_19 | FAM//ATGGAGGGTTTGTCCAGTTG |
| MS2v5-FAM<br>smFISH_20 | FAM//TTTGTCTTGTTGGTGAGAGT |
| MS2v5-FAM<br>smFISH_21 | FAM//CTGATGCTGCTTCGAGAAGA |
| MS2v5-FAM<br>smFISH_22 | FAM//GTATGCTCGAGTGTTCGAA  |
| MS2v5-FAM<br>smFISH_23 | FAM//GATCGTCCACCCAAGAAATA |
| MS2v5-FAM<br>smFISH_24 | FAM//AATTCGTGAGAGCATGGGTG |
| MS2v5-FAM<br>smFISH_25 | FAM//TCGTATTGGACGTGGAACGA |
| MS2v5-FAM<br>smFISH_26 | FAM//TCGTGATCCCGAAAGGTAAG |
| MS2v5-FAM<br>smFISH_27 | FAM//ATCGTGATGCTTGAATGTC  |
| MS2v5-FAM<br>smFISH_28 | FAM//GTTGAGACTTGTGGAGCATG |
| MS2v5-FAM<br>smFISH_29 | FAM//TGAACCCATTTGGTAGTTTC |
| MS2v5-FAM<br>smFISH_30 | FAM//TTTGAGGTAGGAGTGGGTTC |
| MS2v5-FAM<br>smFISH_31 | FAM//TTGCCAGTTTTGTGGGAAGA |
| MS2v5-FAM<br>smFISH_32 | FAM//TTTGGTATGTTGGAATGGGC |
| MS2v5-FAM<br>smFISH_33 | FAM//GATGCTGTACCAGTAATTGT |
| MS2v5-FAM<br>smFISH_34 | FAM//TAGTAGTGAGAGATGTGGGC |

|                        |                           |
|------------------------|---------------------------|
| MS2v5-FAM<br>smFISH_35 | FAM//TGCTGAACGGTTTGGTTTTT |
| MS2v5-FAM<br>smFISH_36 | FAM//TTGATTTTTCCGTGTGTACC |
| MS2v5-FAM<br>smFISH_37 | FAM//GTCTTTCGTATTTGTAAACC |
| MS2v5-FAM<br>smFISH_38 | FAM//TTGCGCTGGACGAAAGCGTG |
| MS2v5-FAM<br>smFISH_39 | FAM//CCGTCGGATGTTTTTCGTAA |
| MS2v5-FAM<br>smFISH_40 | FAM//GGTTGTAAGTTTGTGGGTTG |
| MS2v5-FAM<br>smFISH_41 | FAM//TTGATGTACGGTGCGGTGAT |
| MS2v5-FAM<br>smFISH_42 | FAM//ATCGATATGAGATCTGAGGT |

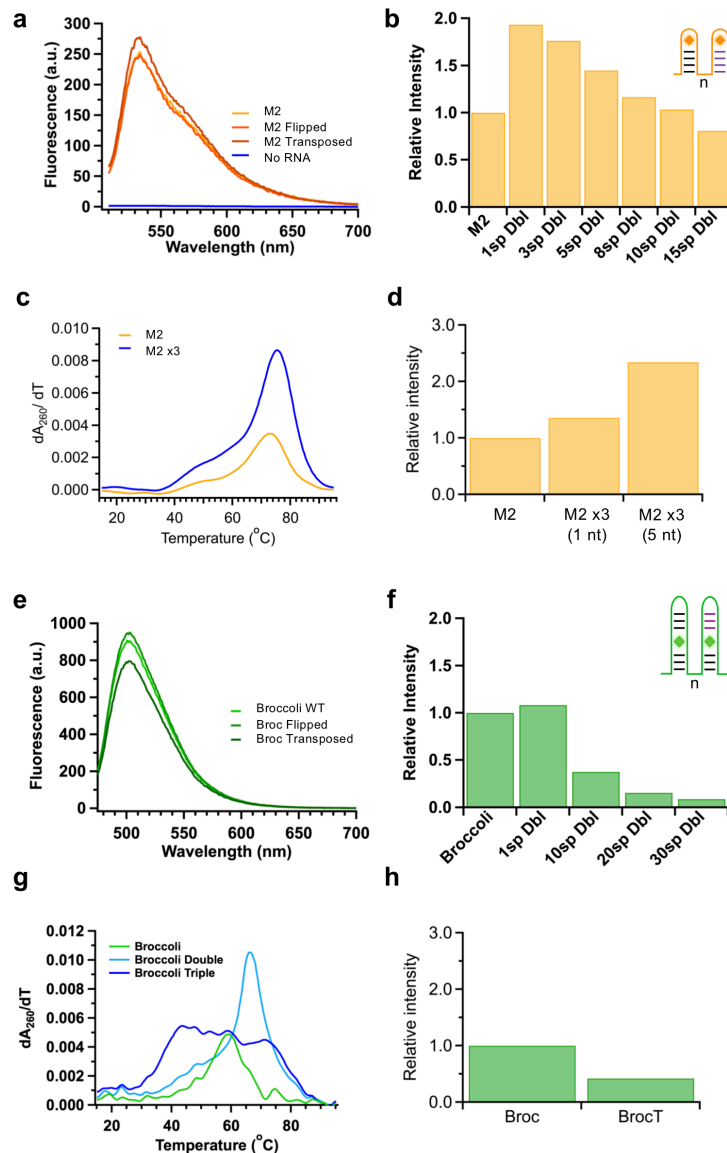

### Supplementary Figure 1 | *In vitro* characterisation of aptamer arrays

(a) Fluorescent spectra of individual mutant Mango sequences (40 nM) either flipped or transposed in the presence of TO1-Biotin (200 nM). (b) Relative fluorescent intensity of dimeric Mango constructs with alteration of the nucleotide spacing (n) between adjacent aptamers. (c) Differentials of the UV melting curves for Mango II and the Mango II x3 (5nt) array. Adapted from main figure 1 to aid comparison with Broccoli constructs. (d) Relative fluorescent intensity of Mango II and the Mango II x3 (1 nt) and (5nt) arrays. (e) Fluorescent spectra of individual mutant Broccoli sequences (40 nM) with the P3 stem either flipped or transposed in the presence of DFHBI (1 μM). (f) Relative fluorescent intensity of dimeric Broccoli constructs with alteration of the nucleotide spacing (n) between adjacent aptamers. (g) Differentials of the UV melting curves for Broccoli the Broccoli (10 nt) dimer and the Broccoli trimeric array. (h) Relative fluorescent intensity of Broccoli and the Broccoli trimeric array (BrocT).

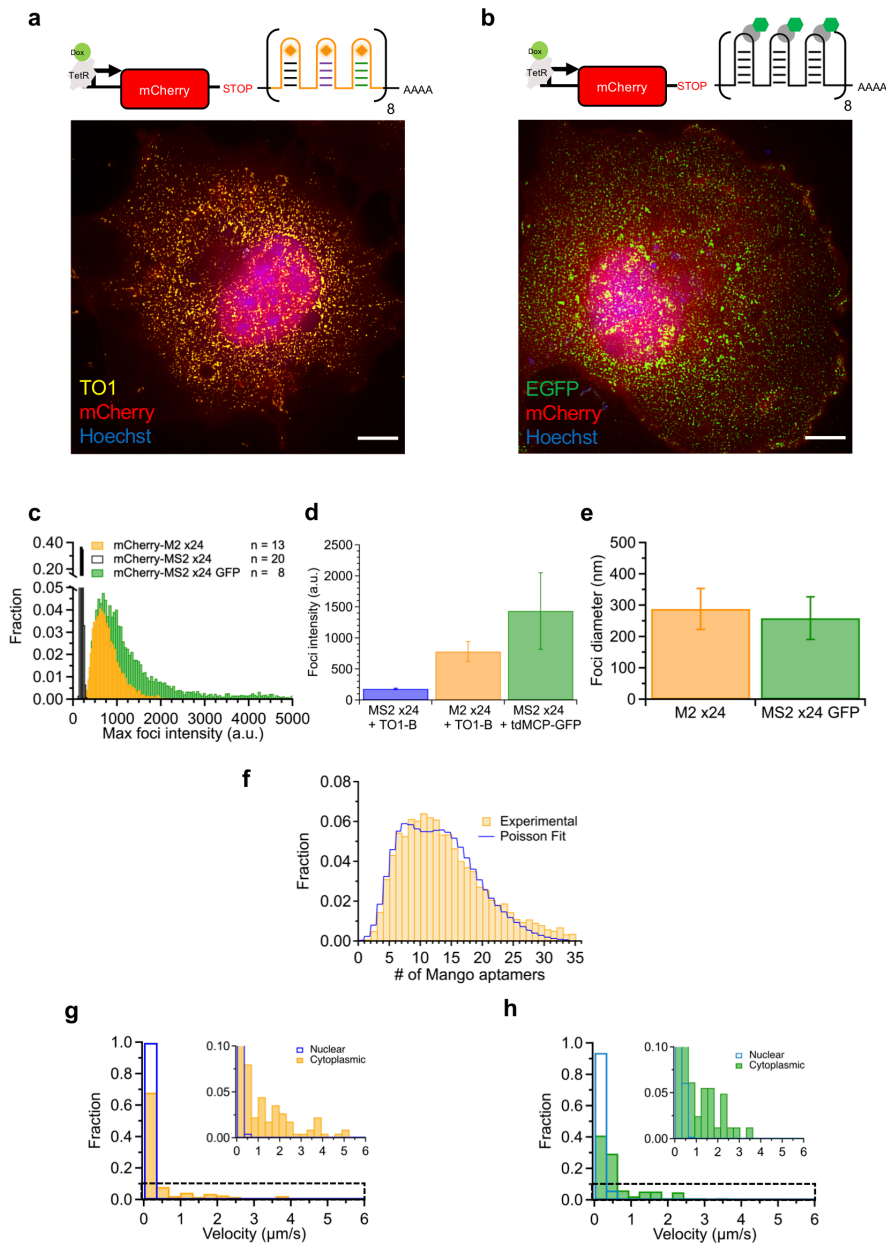

## Supplementary Figure 2 | Comparison of M2 x24 and MS2v5 x24 labelled single RNA molecules

(a) Schematic of the Dox inducible mCherry-M2 x24 construct and a representative maximum projection of a cell displaying evenly dispersed single molecules. Cells stained with 200 nM TO1-B. (b) Schematic of the Dox inducible mCherry-MS2v5x24-tdMCP-EGFP construct and a representative maximum projection of a cell displaying evenly dispersed single molecules. Both scale bars = 10  $\mu\text{m}$ , in Cos-7 Cells. (c) Distribution of single molecule intensities for cells expressing the mCherry-M2 x24 construct + TO1-B (200 nM - yellow), mCherry-MS2v5 x24 + TO1-B (200 nM - black) and mCherry-MS2v5 x24-tdMCP-EGFP (green), 7008, 30,429 and 10,338 foci respectively. N shown in figure depicts number of cells used for analysis. Figure adapted from main figure 2f for direct comparison with EGFP foci. (d) Mean foci intensity of

each construct with the error shown as standard deviation. **(e)** Mean foci diameter of M2 x24 and MS2v5 x24-tdMCP-EGFP RNAs with the error shown as standard deviation. **(f)** Foci intensity distribution shown as # of Mangos as approximated using background subtraction of 150 a.u. and division of the calculated mean step size of 40 a.u (**Fig. 2e**). Following normalisation, the distribution was fit with three Poisson distribution fit as described in the materials and methods. **(g)** Distribution of nuclear (blue) and cytoplasmic (orange) single molecule velocities for the mCherry-M2 x24 construct, n = 229 and 224 respectively. **(h)** Distribution of nuclear (light blue) and cytoplasmic (green) single molecule velocities for the phage-CMV-CFP-MS2SLx24-tdMCP-EGFP construct, n = 461 and 163 respectively.



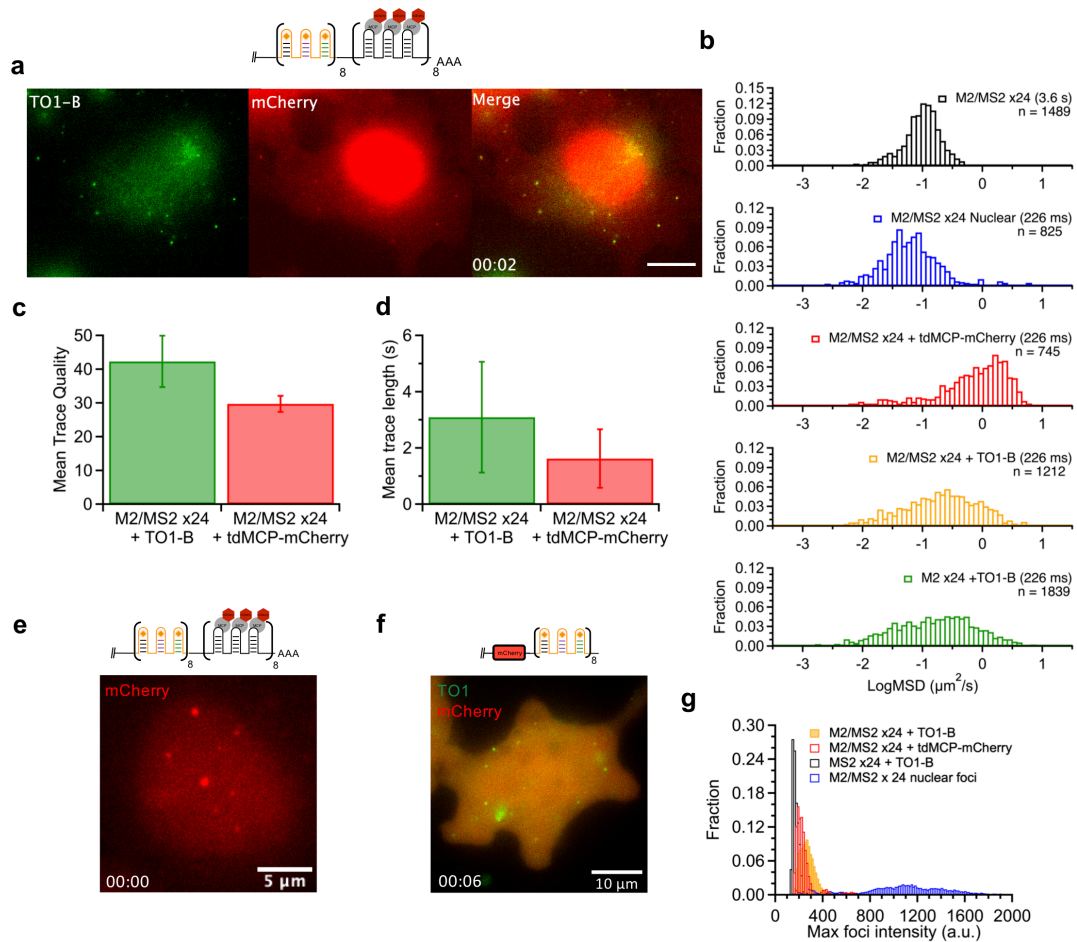

### Supplementary Figure 3 | Live-cell imaging of M2 x24 and MS2-SLx24-tdMCP-mCherry

(a) Live-cell snapshot of a cell expressing the M2/MS2-SLx24-tdMCP-mCherry construct depicting colocalization of the two signals. TO1-B channel – green, mCherry channel – red, scale bar = 10  $\mu\text{m}$  and time shown in seconds. Still taken from Supplementary Movie 4. (b) Distributions of LogMSD for live cell trajectories for M2/MS2-SLx24 tdMCP-mCherry at 3.6 s frame rate (black), nuclear M2/MS2-SLx24 tdMCP-mCherry foci at 226 ms frame rate (blue), cytosolic M2/MS2-SLx24 tdMCP-mCherry foci at 226 ms frame rate (red), M2/MS2-SLx24 + TO1-B at 226 ms frame rate (yellow) and mCherry-M2 x24 + TO1-B at 226 ms frame rate (green). N shown as the number of trajectories analysed from a total of 26 cells. (c) Mean trace quality as determined from the TrackMate plugin for M2/MS2-SLx24 RNA in the presence of TO1-B and tdMCP-mCherry. Green bar represents 1212 traces analysed in the TO1-B channel (green). Red bar represents 745 traces analysed in the mCherry channel (red). (d) Mean trace length as determined from the TrackMate plugin for M2/MS2-SLx24 RNA in the presence of TO1-B and tdMCP-mCherry. Green bar represents 1212 traces analysed in the TO1-B channel (green). Red bar represents 745 traces analysed in the mCherry channel (red). Error bars depict standard deviation of the data sets. (e) Representative image of M2/MS2-SLx24 + tdMCP-mCherry nuclear foci observed in the red channel, scale bar = 5  $\mu\text{m}$

and time shown in seconds. Still taken from Supplementary Movie 7. **(f)** Representative snapshot of mCherry-M2 x24 foci in live cell showing presence of foci fluorescing specifically in the green channel and mCherry signal in the red channel, scale bar = 10  $\mu\text{m}$  and time shown in seconds. Still taken from Supplementary Movie 1. **(g)** Live-cell foci intensity distributions for mCherry-MS2v5 x24 + TO1-B (black), M2/MS2-SLx24 + TO1-B (yellow), cytosolic M2/MS2-SLx24 + tdMCP-mCherry (red) and nuclear M2/MS2-SLx24 + tdMCP-mCherry (blue). n = 33,370, 17,544, 5881 and 12, 937 foci from a total of 26 cells. Data adapted from main figure 3 h for comparison with nuclear foci distribution.

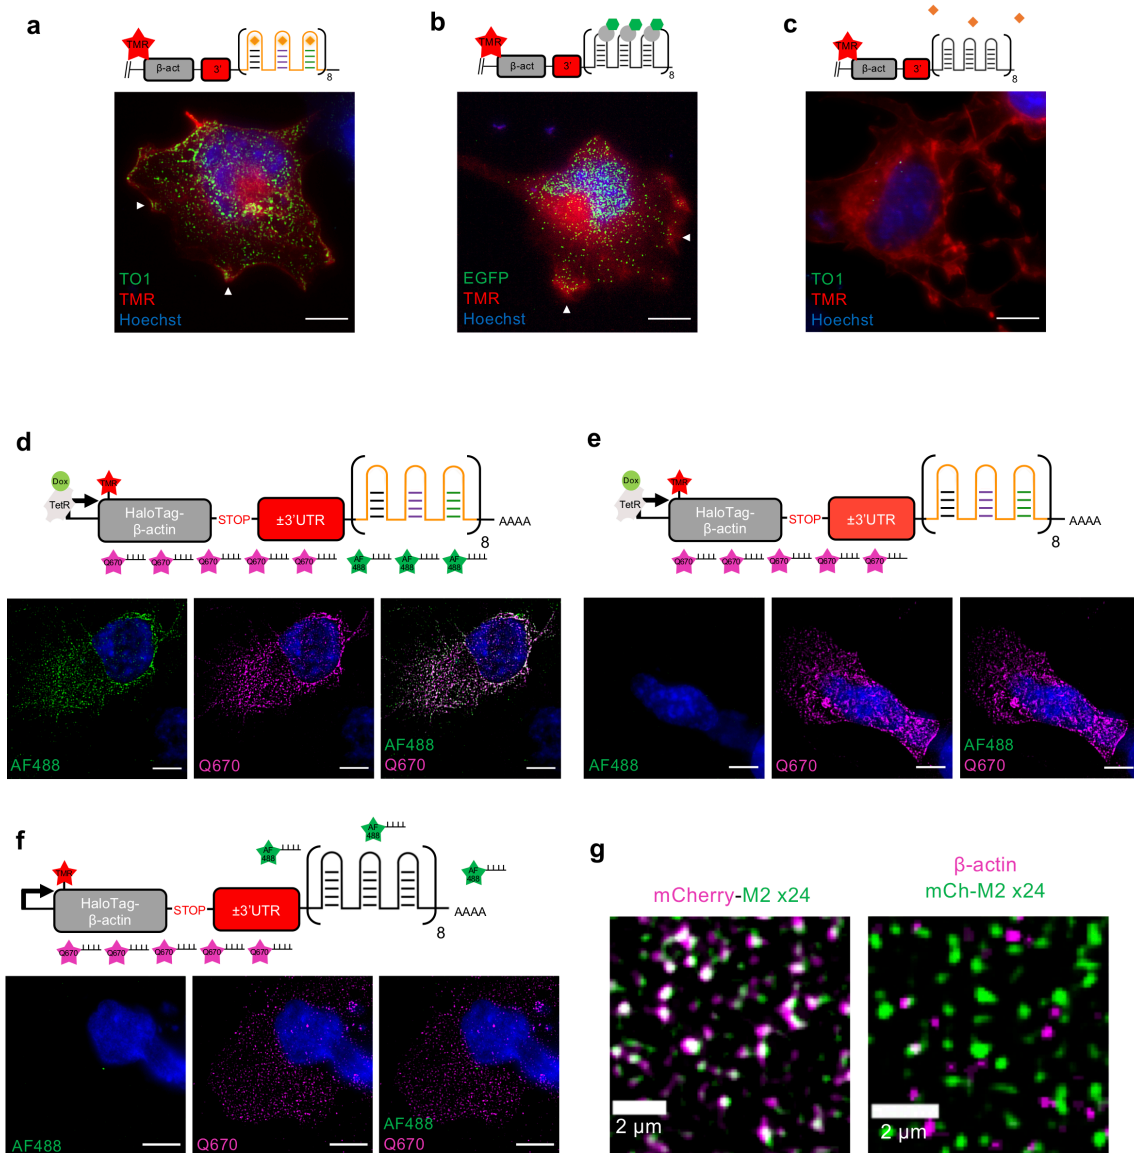

### Supplementary Figure 4 | Validation of $\beta$ -actin mRNA constructs

(a - c) Expression of Halo-tagged  $\beta$ -actin mRNA constructs in Cos-7 cells labelled with TMR-Halo ligand showing local expression of  $\beta$ -actin protein. (a) depicts Halo- $\beta$ -actin-3'UTR M2 x24 + TO1-B expression, (b) Halo- $\beta$ -actin-3'UTR MS2v5 x24 + tdMCP-EGFP and (c) Halo- $\beta$ -actin-3'UTR MS2v5 x24 + TO1-B. White arrows depict mRNA signal at cell periphery, mRNA signal – green, protein signal – red, nuclear signal – blue and scale bars = 10  $\mu$ m. (d) Diagram and images of Halo- $\beta$ -actin-3'UTR M2 x24 expression dually labelled with  $\beta$ -actin-Q670 (magenta) and M2-AF488 (green) probes. (e) Diagram and images of Halo- $\beta$ -actin-3'UTR M2 x24 expression singly labelled with  $\beta$ -actin-Q670 (magenta) probes. (f) Diagram and images of Halo- $\beta$ -actin-3'UTR MS2v5 x24 expression dually labelled with  $\beta$ -actin-Q670 (magenta) and M2-AF488 (green) probes. Scale bars = 10  $\mu$ m. (g) Images of mCherry-M2 x24 expression

dually labelled with mCherry-Q670 (magenta) and M2-AF488 (green) probes, left and dually labelled with  $\beta$ -actin-Q670 (magenta) and M2-AF488 (green) probes, right. Scale bars = 2  $\mu$ m.

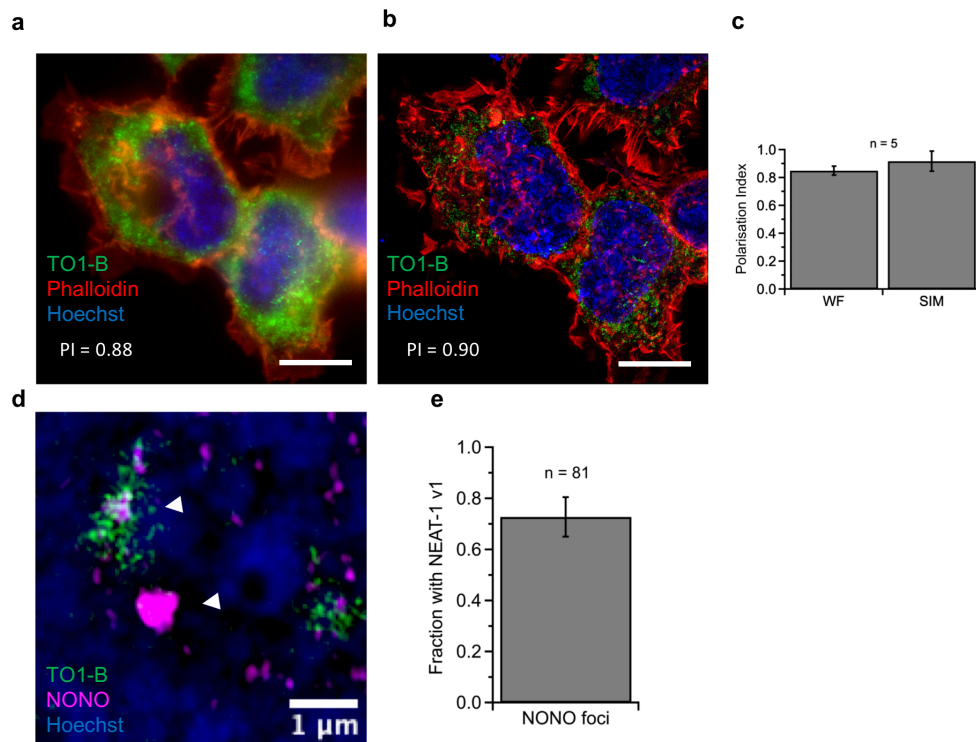

### Supplementary Figure 5 | Quantification and validation of SIM images

(a) Widefield image of  $\beta$ -actin- $\Delta$ 3'UTR-M2 x24 + TO1-B with average PI value depicted in the bottom left hand corner (b) Structured illumination microscopy image of  $\beta$ -actin- $\Delta$ 3'UTR-M2 x24 + TO1-B cell with the average PI also depicted in the bottom left corner. Data adapted from main figure 5 for direct comparison of PI values, scale bars = 10  $\mu$ m. (c) Quantification of the average PI value for 5 cells using both widefield and SIM images showing only a minimal change in PI. (d) Image of paraspeckle formation either containing NEAT-1 v1-M2 x24 (top left foci) or showing its absence (bottom left foci) as depicted with white arrows. NONO antibody stain (magenta), TO1-B (green) and Hoechst (blue). Scale bar = 1  $\mu$ m. (e) Quantification of 81 paraspeckles showing an association of NEAT-1 v1-M2 x24 with ~ 70% of foci, error bars depicted as standard deviation.
